# Supplementary material for: Cooking or Clicking: The Impact of Online Food Delivery Platforms on Domestic Food Preparation
Source: Atypon-hosted journal article supplement (doi:10.1287/mnsc.2023.02636), 2025-11-20
Supplement: mnsc.2023.02636.sm1.pdf [file mnsc.2023.02636.sm1.pdf]

**Online Appendix for - Cooking or Clicking: The Impact of Online Food Delivery Platforms on Domestic Food Preparation**  
*(Online Appendix for Management Science manuscript no: MS-INS-2023-02636)*

Yash Babar  
Wisconsin School of Business, University of Wisconsin-Madison

Ali M Adeli  
Driehaus College of Business, DePaul University

Brad N Greenwood  
Costello College of Business, George Mason University

**Contents**

1 Appendix A: Additional Tables & Figures ..... 1

2 Appendix B: Survey design ..... 13

3 Appendix C: Google Trends DATA ..... 17

## 1 APPENDIX A: ADDITIONAL TABLES & FIGURES

**Table A1. Survey weighted means (with SDR linearized SEs) of key variables of individual ATUS microdata for subsampled population reporting cooking times over 2005-19 over 230 US counties, N = 86,691 and population size = 118,974,989.**

| Variable               | Mean  | Std. Dev. |
|------------------------|-------|-----------|
| CookingTime (Mins)     | 60.98 | 59.4      |
| GrubhubAgg (1/0)       | 0.16  | 0.37      |
| GrubhubDel (1/0)       | 0.06  | 0.25      |
| Age (years)            | 47.55 | 17.72     |
| Female (1/0)           | 0.63  | 0.48      |
| FamIncome (1000's USD) | 69.05 | 54.41     |
| HHSize                 | 2.95  | 1.56      |
| HHNumKids              | 0.78  | 1.15      |

This table is comparable to Table 1 in the main manuscript which reports unweighted summary statistics.

**Table A2. Correlations for Cooking Times in ATUS, 2005-2019 for all 230 counties in the sample.**

| Variables                  | (1)    | (2)    | (3)    | (4)    | (5)    | (6)   | (7)  |
|----------------------------|--------|--------|--------|--------|--------|-------|------|
| (1) CookingTime (Mins)     | 1.00   |        |        |        |        |       |      |
| (2) GrubhubAgg (1/0)       | 0.02*  | 1.00   |        |        |        |       |      |
| (3) GrubhubDel (1/0)       | 0.01*  | 0.56*  | 1.00   |        |        |       |      |
| (4) Age (years)            | 0.09*  | 0.02*  | 0.02*  | 1.00   |        |       |      |
| (5) Female (1/0)           | 0.24*  | -0.00  | -0.00  | 0.05*  | 1.00   |       |      |
| (6) FamIncome (1000's) USD | -0.03* | 0.07*  | 0.05*  | -0.12* | -0.08* | 1.00  |      |
| (7) HHSize                 | 0.07*  | -0.02* | -0.02* | -0.47* | -0.03* | 0.24* | 1.00 |

\* shows significance at the 0.05 level

**Table A3. Impact of Grubhub on the propensity to report any cooking activity among respondents from 2005-2019 in counties with a population >= 100K, eventually receiving at least GrubhubAgg.**

| DV = AnyCooking [0/1]  | (1)                        | (2)                                   |
|------------------------|----------------------------|---------------------------------------|
|                        | County Clustered SEs       | SDR Clustered SEs<br>160 Replications |
| GrubhubAgg             | -0.017<br>(0.017)          | -0.017<br>(0.015)                     |
| GrubhubDel             | 0.025<br>(0.019)           | 0.025<br>(0.019)                      |
| FamInc (1000's)        | -0.000<br>(0.000)          | -0.000<br>(0.000)                     |
| HHSIZE                 | -0.017***<br>(0.005)       | -0.017***<br>(0.004)                  |
| HHNumKids              | 0.055***<br>(0.006)        | 0.055***<br>(0.006)                   |
| Female                 | 0.257***<br>(0.008)        | 0.257***<br>(0.007)                   |
| Age(yrs)               | 0.005***<br>(0.000)        | 0.005***<br>(0.000)                   |
| Not In Workforce       | -0.013<br>(0.010)          | -0.013+<br>(0.008)                    |
| Unemployed             | 0.054***<br>(0.015)        | 0.054***<br>(0.014)                   |
| Unemployment(%)        | 0.001<br>(0.004)           | 0.001<br>(0.004)                      |
| Log(Population)        | 0.012<br>(0.209)           | 0.012<br>(0.259)                      |
| Log(F&BCnt)            | 0.191*<br>(0.089)          | 0.191<br>(0.118)                      |
| <i>Fixed Effects</i>   | Race, County, State * Year |                                       |
| <i>N</i>               | 40,127                     | 40,127                                |
| <i>Population Size</i> | -                          | 59,426,785                            |
| <i>R</i> <sup>2</sup>  | 0.130                      | 0.130                                 |

SEs in parentheses +  $p < 0.1$ , \*  $p < 0.05$ , \*\*  $p < 0.01$ , \*\*\*  $p < 0.001$

| Variable   | Nobs.  | Min | Max | Mean | SD   |
|------------|--------|-----|-----|------|------|
| AnyCooking | 40,127 | 0   | 1   | 0.57 | 0.49 |

**Figure A1. Comparison of demographics between ATUS panels from Table 2.**

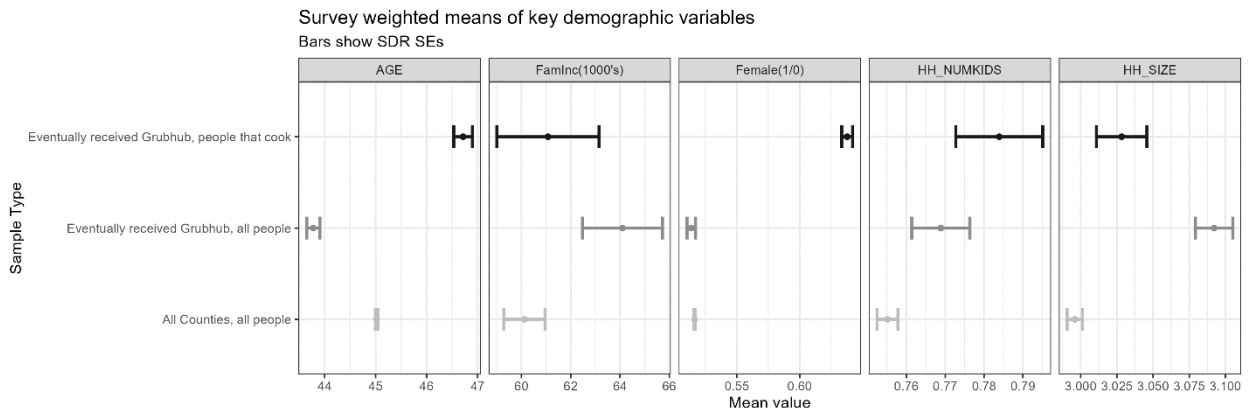

**Table A4. Summary statistics for other reported activities in ATUS, 2005-2019 for potentially treated with GrubhubAgg counties.**

| Activity duration, when respondent engaged in the activity | Nobs.  | Min | Max  | Mean   | SD     |
|------------------------------------------------------------|--------|-----|------|--------|--------|
| Eating Duration (Mins)                                     | 41,502 | 1   | 1320 | 72.25  | 52.52  |
| Eating at Restaurants Duration (Mins)                      | 8,500  | 1   | 765  | 72.64  | 49.93  |
| Socializing Duration (Mins)                                | 15,203 | 1   | 944  | 113.74 | 113.30 |
| Watching TV Duration (Mins)                                | 34,320 | 1   | 1313 | 216.57 | 173.23 |

  

| Activity duration, when respondent reported cooking at least once. | Nobs.  | Min | Max | Mean  | SD    |
|--------------------------------------------------------------------|--------|-----|-----|-------|-------|
| Morning Cooking Duration (Mins)                                    | 23,060 | 0   | 770 | 18.43 | 34.92 |
| Midday Cooking Duration (Mins)                                     | 23,060 | 0   | 745 | 13.4  | 32.39 |
| Evening Cooking Duration (Mins)                                    | 23,060 | 0   | 470 | 32.99 | 38.07 |

**Table A5. Heterogeneity in Impact of Grubhub on Cooking Time (mins)**

| DV = CookingTimes (mins) | (1)                                       | (2)                  | (3)                   | (4)                  | (5)                  |
|--------------------------|-------------------------------------------|----------------------|-----------------------|----------------------|----------------------|
| GrubhubAgg               | 1.077<br>(2.126)                          | 1.077<br>(2.126)     | 0.798<br>(2.073)      | 0.167<br>(2.177)     | -0.178<br>(2.237)    |
| GrubhubDelivery          | -7.831***<br>(2.135)                      | -7.831***<br>(2.135) | -16.442***<br>(4.083) | 21.794+<br>(11.207)  | 7.062<br>(13.584)    |
| FamInc (1000's)          | -0.062***<br>(0.009)                      | -0.062***<br>(0.009) | -0.061***<br>(0.009)  | -0.061***<br>(0.009) | -0.062***<br>(0.009) |
| HHSIZE                   | 6.298***<br>(0.684)                       | 6.298***<br>(0.684)  | 6.297***<br>(0.685)   | 6.262***<br>(0.681)  | 6.314***<br>(0.686)  |
| HHNumKids                | 1.424<br>(0.905)                          | 1.424<br>(0.905)     | 2.103*<br>(0.842)     | 2.159*<br>(0.837)    | 1.428<br>(0.907)     |
| Female                   | 19.613***<br>(1.611)                      | 19.613***<br>(1.611) | 19.578***<br>(1.619)  | 19.531***<br>(1.618) | 19.556***<br>(1.611) |
| Age(years)               | 0.363***<br>(0.043)                       | 0.363***<br>(0.043)  | 0.364***<br>(0.044)   | 0.362***<br>(0.043)  | 0.362***<br>(0.043)  |
| Unemployment (%)         | -0.696<br>(0.584)                         | -0.696<br>(0.584)    | -0.636<br>(0.588)     | -1.058+<br>(0.584)   | -0.926<br>(0.595)    |
| Log(Population)          | -5.047<br>(18.813)                        | -5.047<br>(18.813)   | 7.638<br>(18.202)     | -28.741<br>(18.947)  | -15.377<br>(19.229)  |
| Log(FBCounts)            | 1.414<br>(15.001)                         | 1.414<br>(15.001)    | 3.884<br>(15.426)     | 8.066<br>(16.008)    | 8.868<br>(16.316)    |
| GrubhubDelivery*         | 3.120*<br>(1.377)                         | 3.120*<br>(1.377)    |                       |                      | 2.955*<br>(1.373)    |
| HHNumKids                |                                           |                      | 1.945**               |                      | 1.298+<br>(0.705)    |
| GrubhubDelivery*         |                                           |                      | (0.647)               |                      |                      |
| Unemployment(%)          |                                           |                      |                       | -3.323*              | -2.657+              |
| GrubhubDelivery*         |                                           |                      |                       |                      |                      |
| Log(FBCounts)            |                                           |                      |                       | (1.303)              | (1.344)              |
| <i>Fixed Effects</i>     | <i>Race, County, State*Year, EmpState</i> |                      |                       |                      |                      |
| <i>N</i>                 | 23,061                                    | 23,061               | 23,061                | 23,061               | 23,061               |
| <i>R</i> <sup>2</sup>    | 0.136                                     | 0.136                | 0.136                 | 0.136                | 0.137                |

Clustered (by County) SEs in parentheses, +  $p < 0.1$ , \*  $p < 0.05$ , \*\*  $p < 0.01$ , \*\*\*  $p < 0.001$

**Table A6. Impact of Grubhub Proxies on Cooking Times (mins)**

| DV = CookingTime (mins)                          | BaseModel                | GTrends 1          | GTrends 2          | GTrends 3          | GHCnt              |
|--------------------------------------------------|--------------------------|--------------------|--------------------|--------------------|--------------------|
|                                                  | (1)                      | (2)                | (3)                | (4)                | (5)                |
| GrubhubAgg                                       | 1.32<br>(2.08)           | 1.64<br>(2.20)     | -0.79<br>(2.55)    |                    | -1.75<br>(2.82)    |
| GrubhubDel                                       | -5.68**<br>(1.95)        | -6.28**<br>(2.03)  | -3.13<br>(4.46)    |                    |                    |
| Age (yrs)                                        | 0.36***<br>(0.04)        | 0.36***<br>(0.05)  | 0.36***<br>(0.05)  | 0.36***<br>(0.05)  | 0.34***<br>(0.05)  |
| Female                                           | 19.59***<br>(1.62)       | 20.17***<br>(1.67) | 20.19***<br>(1.67) | 20.18***<br>(1.67) | 21.05***<br>(1.71) |
| FamInc (1000's)                                  | -0.06***<br>(0.01)       | -0.06***<br>(0.01) | -0.06***<br>(0.01) | -0.06***<br>(0.01) | -0.06***<br>(0.01) |
| HHSize                                           | 6.27***<br>(0.68)        | 6.40***<br>(0.70)  | 6.39***<br>(0.70)  | 6.39***<br>(0.70)  | 5.69***<br>(0.64)  |
| HHNumkids                                        | 2.16*<br>(0.84)          | 1.96*<br>(0.86)    | 1.96*<br>(0.86)    | 1.95*<br>(0.86)    | 1.99*<br>(0.96)    |
| Not In Workforce                                 | 16.31***<br>(1.24)       | 16.51***<br>(1.34) | 16.53***<br>(1.34) | 16.54***<br>(1.34) | 17.00***<br>(1.38) |
| Unemployed                                       | 19.10***<br>(2.10)       | 19.78***<br>(2.13) | 19.78***<br>(2.14) | 19.76***<br>(2.13) | 18.57***<br>(2.24) |
| Log(Population)                                  | -5.15<br>(18.85)         | 4.86<br>(17.44)    | 7.68<br>(17.93)    | 6.00<br>(17.98)    | -1.69<br>(23.96)   |
| Log(FBCount)                                     | 1.07<br>(15.04)          | 1.79<br>(15.16)    | -4.07<br>(15.49)   | -4.22<br>(15.50)   | 1.71<br>(17.51)    |
| Unemployment(%)                                  | -0.71<br>(0.58)          | -0.54<br>(0.59)    | -0.45<br>(0.63)    | -0.38<br>(0.61)    | -0.51<br>(0.85)    |
| Gtrends (DoorDash)                               |                          | -0.20<br>(0.72)    | -0.29<br>(0.72)    | -0.26<br>(0.73)    |                    |
| Gtrends (Grubhub)                                |                          | -0.43<br>(0.49)    | -3.46<br>(2.17)    | -2.56<br>(1.91)    |                    |
| GrubhubAgg *Gtrends(Grubhub)                     |                          |                    | 3.15<br>(1.95)     | 2.36<br>(1.76)     |                    |
| GrubhubDel * Gtrends(Grubhub)                    |                          |                    | -0.48<br>(0.43)    | -0.74***<br>(0.19) |                    |
| GrubhubDel * Log<br>(GHRestCnt <sub>2015</sub> ) |                          |                    |                    |                    | -1.05***<br>(0.23) |
| Fixed Effects                                    | County, State*Year, Race |                    |                    |                    |                    |
| Num. obs.                                        | 23,061                   | 21,448             | 21,448             | 21,448             | 19,463             |
| Adj. R <sup>2</sup> (full model)                 | 0.12                     | 0.12               | 0.12               | 0.12               | 0.11               |
| Adj. R <sup>2</sup> (proj model)                 | 0.10                     | 0.10               | 0.10               | 0.10               | 0.10               |

\*\*\*p < 0.001; \*\*p < 0.01; \*p < 0.05; +p < 0.1, SEs in parentheses clustered by geography

**Note:** Model (3) the completely specified interaction model shows a high VIF factor > 20 and is thus presented only for completeness and is likely not reliable. In the text only models (2), (4) and (5) are referred to.

**Descriptive Statistics for Grubhub Proxies**

| Variable          | Mean     | SD       | Min  | Max    |
|-------------------|----------|----------|------|--------|
| Grubhub(Gtrends)  | 3.01     | 4.44     | 0.00 | 17.50  |
| DoorDash(Gtrends) | 1.49     | 3.80     | 0.00 | 18.58  |
| GHRestCnt(2015)   | 3,927.05 | 5,245.54 | 13   | 14,826 |

**Table A7. Impact of Grubhub delivery relative to year of platform entry per geography.**

|                                  | (1)<br>DV = CookingTime (mins)        | (2)<br>DV=log(BMI)                                  |
|----------------------------------|---------------------------------------|-----------------------------------------------------|
| RtYear-6                         | -2.83<br>(3.82)                       | 0.009*<br>(0.004)                                   |
| RtYear-5                         | 4.66<br>(4.40)                        | 0.006<br>(0.004)                                    |
| RtYear-4                         | -1.24<br>(3.35)                       | -0.004<br>(0.003)                                   |
| RtYear-3                         | -0.34<br>(4.42)                       | 0.001<br>(0.005)                                    |
| RtYear-2                         | -0.22<br>(3.98)                       | 0.004<br>(0.005)                                    |
| RtYear+0                         | -0.75<br>(4.21)                       | 0.014**<br>(0.005)                                  |
| RtYear+1                         | -9.47*<br>(4.18)                      | 0.010<br>(0.006)                                    |
| RtYear+2                         | -4.91<br>(4.06)                       | -0.000<br>(0.007)                                   |
| RtYear+3                         | -12.71*<br>(5.82)                     | -0.002<br>(0.006)                                   |
| RtYear+4                         | -8.44<br>(6.25)                       | 0.009<br>(0.005)                                    |
| Age (yrs)                        | 0.36***<br>(0.04)                     | 0.006***<br>(0.000)                                 |
| Female                           | 19.57***<br>(1.62)                    | -0.033***<br>(0.002)                                |
| HHIncome (1000's)                | -0.06***<br>(0.01)                    | -0.000***<br>(0.000)                                |
| Log(PopEstimate)                 | -10.46<br>(18.02)                     | 0.038<br>(0.063)                                    |
| HHSIZE                           | 6.25***<br>(0.68)                     |                                                     |
| HHNumKids                        | 2.16*<br>(0.84)                       |                                                     |
| Log(FBCounts)                    | 2.74<br>(14.83)                       |                                                     |
| Unemployment (%)                 | -0.91<br>(0.58)                       |                                                     |
| Log(TotEmployed)                 |                                       | 0.019<br>(0.033)                                    |
| Log(Total GDP(1000s))            |                                       | 0.055<br>(0.028)                                    |
| Log(AvgPersonalIncome(1000s))    |                                       | -0.095***<br>(0.023)                                |
| Fixed Effects                    | County, State*Year,<br>Race, EmpState | Race, Marital Status,<br>Education, MSA, State*Year |
| Num. obs.                        | 23,061                                | 1,837,061                                           |
| Num of Geographies               | 85 (Counties)                         | 73 (MSAs)                                           |
| Adj. R <sup>2</sup> (full model) | 0.12                                  | 0.06                                                |
| Adj. R <sup>2</sup> (proj model) | 0.10                                  |                                                     |

\*\*\*p < 0.001; \*\*p < 0.01; \*p < 0.05; †p < 0.1, SEs in parentheses clustered by geography

**Note:** The reader should be cautious in directly comparing the relative temporal trends across the two different outcomes as they capture the behavior across different geographies. On limiting the ATUS sample to counties completely within the BRFSS MSAs, 25 counties remain. In this restricted sample, when the relative time model for cooking times is repeated, we find that the effect of Grubhub Delivery manifests for both outcomes within the year of treatment (RtYear+0).

**Figure A2. Distributions (overlapping) of predicted propensities of treatment between treated (light gray) and untreated (dark gray) county-year observations.**

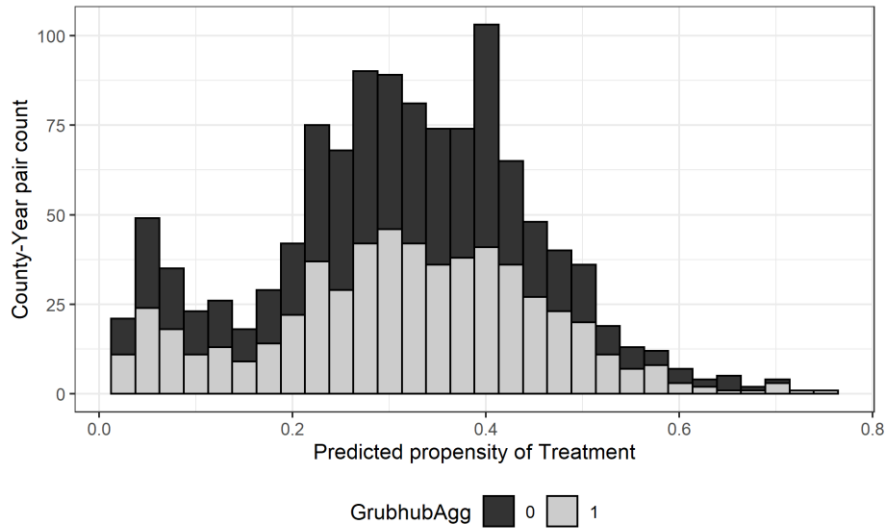

**Table A8. Grubhub impact on Cooking Time PSM results 2005-19, eventually treated with GrubhubAgg only counties.**

| DV = CookingTime (mins)          | PSM Matched Counties                        | PSM Matched Counties (only eventually treated) |
|----------------------------------|---------------------------------------------|------------------------------------------------|
| GrubhubAgg                       | 4.877<br>(3.569)                            | 4.808<br>(3.730)                               |
| GrubhubDelivery                  | -5.500*<br>(2.478)                          | -6.378*<br>(2.729)                             |
| FamInc (1000's)                  | -0.053***<br>(0.009)                        | -0.058***<br>(0.010)                           |
| HHSize                           | 7.082***<br>(0.536)                         | 7.272***<br>(0.605)                            |
| Age (years)                      | 0.357***<br>(0.048)                         | 0.356***<br>(0.052)                            |
| Female                           | 21.680***<br>(1.502)                        | 21.999***<br>(1.680)                           |
| Log(FBCnts)                      | 11.771<br>(18.131)                          | 14.877<br>(18.325)                             |
| Log(Population)                  | -65.043<br>(52.591)                         | -46.055<br>(60.147)                            |
| Unemployment (%)                 | -0.215<br>(1.124)                           | -0.613<br>(1.139)                              |
| Fixed Effects                    | Race, County, State*Year, Employment Status |                                                |
| Num. obs.                        | 16,184                                      | 13,888                                         |
| Num. of Counties                 | 176                                         | 85                                             |
| Adj. R <sup>2</sup> (full model) | 0.117                                       | 0.120                                          |
| Adj. R <sup>2</sup> (proj model) | 0.107                                       | 0.111                                          |

\*\*\*p < 0.001; \*\*p < 0.01; \*p < 0.05, County Clustered SEs in parentheses

**Table A9. Grubhub impact on Cooking Time placebo results 2005-19, eventually treated with GrubhubAgg only counties.**

| DV = cooking time                | 1                    | 2                          | 3                          |
|----------------------------------|----------------------|----------------------------|----------------------------|
|                                  | Baseline             | Placebo Entry<br>(-1 year) | Placebo Entry<br>(-2 year) |
| GrubhubAgg                       | 1.318<br>(2.080)     | 1.348<br>(1.976)           | 1.343<br>(1.960)           |
| GrubhubDel                       | -5.677**<br>(1.949)  |                            |                            |
| Placebo GrubhubDel               |                      | 1.148<br>(3.324)           | 0.181<br>(2.928)           |
| Age                              | 0.363***<br>(0.044)  | 0.362***<br>(0.046)        | 0.362***<br>(0.046)        |
| Female                           | 19.590***<br>(1.618) | 19.307***<br>(1.827)       | 19.306***<br>(1.827)       |
| FamIncome (1000s)                | -0.061***<br>(0.009) | -0.059***<br>(0.011)       | -0.059***<br>(0.011)       |
| HHSize                           | 6.266***<br>(0.681)  | 6.623***<br>(0.744)        | 6.621***<br>(0.745)        |
| HHNumkids                        | 2.157*<br>(0.837)    | 1.031<br>(1.008)           | 1.032<br>(1.006)           |
| Not In Workforce                 | 16.310***<br>(1.243) | 15.861***<br>(1.319)       | 15.861***<br>(1.321)       |
| Unemployed                       | 19.098***<br>(2.099) | 16.903***<br>(2.567)       | 16.904***<br>(2.568)       |
| Log(Population)                  | -5.152<br>(18.850)   | -2.194<br>(22.165)         | -1.621<br>(22.404)         |
| Log(FBCount)                     | 1.069<br>(15.036)    | 13.463<br>(20.232)         | 13.338<br>(20.291)         |
| Unemployment(%)                  | -0.710<br>(0.584)    | -1.486*<br>(0.599)         | -1.480*<br>(0.600)         |
| Fixed Effects                    | Race, County*Year    |                            |                            |
| Num. obs.                        | 23061                | 18565                      | 18565                      |
| Num. Counties                    | 85                   | 85                         | 85                         |
| Adj. R <sup>2</sup> (full model) | 0.115                | 0.108                      | 0.108                      |
| Adj. R <sup>2</sup> (proj model) | 0.096                | 0.088                      | 0.088                      |

County clustered SEs in parenthesis \*\*\* p &lt; 0.001; \*\* p &lt; 0.01; \* p &lt; 0.05; † p &lt; 0.1

**Figure A3. Distribution of GrubhubDel Estimates on Cooking Time using leave one out.**

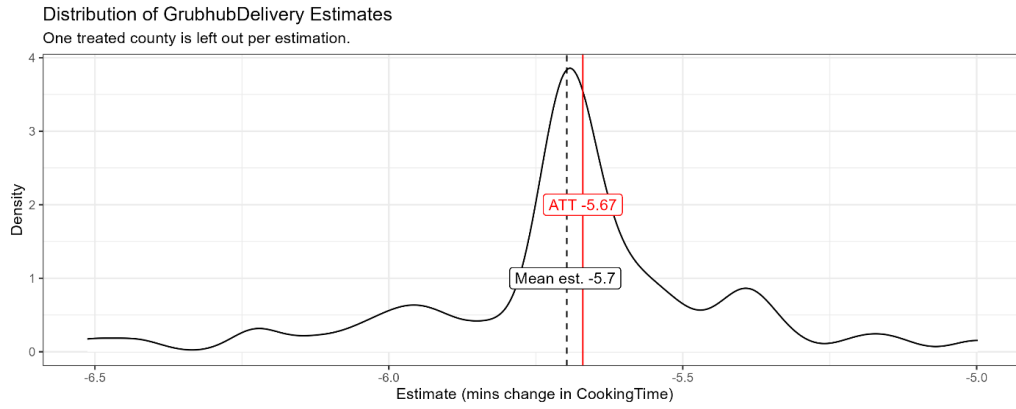

**Figure A4. Estimated treatment effects per county among counties that eventually receive Grubhub.**

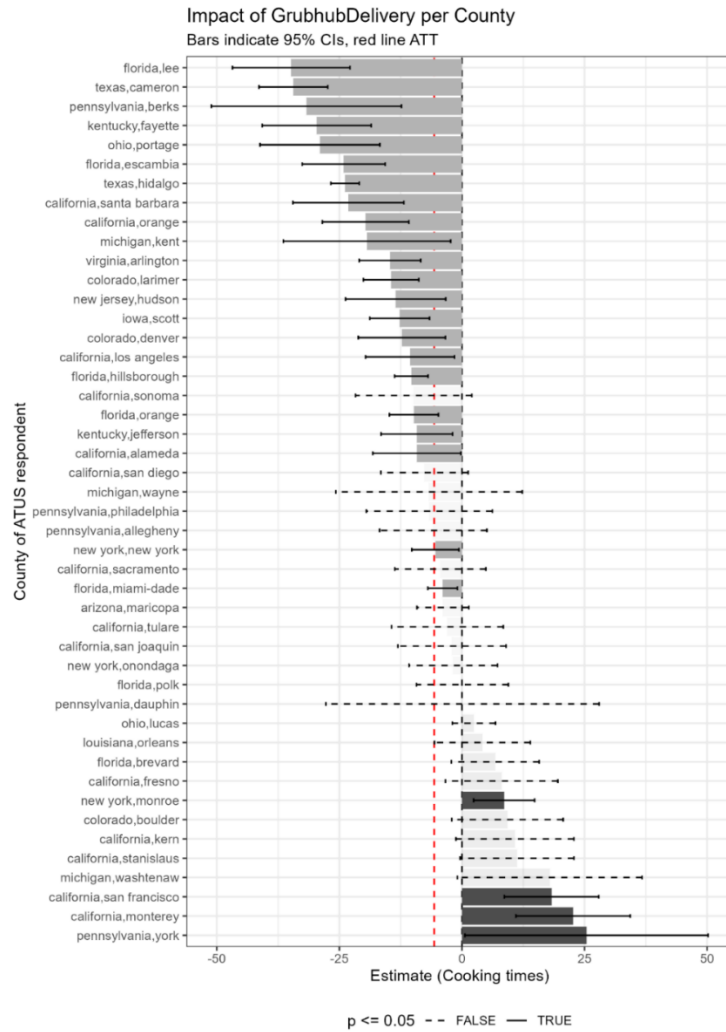

**Table A10. Impact on Cooking Time controlling for interest in meal kits**

| DV = CookingTime (mins)                  | All Counties                       | Eventually Treated Counties |
|------------------------------------------|------------------------------------|-----------------------------|
| GrubhubAgg                               | -0.15<br>(1.78)                    | 1.21<br>(2.07)              |
| GrubhubDelivery                          | -5.07**<br>(1.89)                  | -5.78**<br>(1.92)           |
| Age (years)                              | 0.34***<br>(0.04)                  | 0.36***<br>(0.04)           |
| Female                                   | 19.31***<br>(1.27)                 | 19.58***<br>(1.62)          |
| FamInc (1000's)                          | -0.05***<br>(0.01)                 | -0.06***<br>(0.01)          |
| HHSize                                   | 5.76***<br>(0.56)                  | 6.27***<br>(0.68)           |
| HHNumKids                                | 2.32**<br>(0.70)                   | 2.16*<br>(0.83)             |
| Log(Population)                          | -8.75<br>(18.39)                   | -9.96<br>(18.48)            |
| Log(FBCounts)                            | -9.90<br>(11.93)                   | 4.90<br>(15.03)             |
| Unemployment (%)                         | -0.35<br>(0.45)                    | -0.74<br>(0.58)             |
| MealKits <sub>GTrends</sub> <sup>1</sup> | 1.63<br>(1.52)                     | 2.63<br>(1.81)              |
| Fixed Effects                            | County, Race, State*Year, EmpState |                             |
| Num. obs.                                | 31,259                             | 23,061                      |
| Num. groups: COUNTY                      | 181                                | 85                          |
| Adj. R <sup>2</sup> (full model)         | 0.11                               | 0.12                        |
| Adj. R <sup>2</sup> (proj model)         | 0.09                               | 0.10                        |

\*\*\*p < 0.001; \*\*p < 0.01; \*p < 0.05; †p < 0.1, SEs clustered by counties in parentheses

<sup>1</sup> MealKit<sub>GTrends</sub> ( $\mu = 0.13, SD = 0.35$ ) was measured as a binary indicator of non-zero interest expressed in search terms “Hello Fresh” or “Blue Apron” (the market leaders in US for meal kit providers) per geography. Since Google trends are captured in relative terms we used (Hall et al. 2018)’s approach of using a single geography (in our case San Francisco-Oakland CA) as the comparison point for all others to arrive at cross geography, cross keyword, over time comparable relative search volumes.

**Table A11. Impact on Cooking Time of Grubhub and UberEats**

|                                  | All Counties                       | Eventually Treated Counties    |
|----------------------------------|------------------------------------|--------------------------------|
| GrubhubAgg                       | 0.03<br>(1.77)                     | 1.15<br>(2.12)                 |
| GrubhubDelivery                  | -4.29 <sup>+</sup><br>(2.55)       | -4.56<br>(2.83)                |
| Age (years)                      | 0.34 <sup>***</sup><br>(0.04)      | 0.36 <sup>***</sup><br>(0.04)  |
| Female                           | 19.32 <sup>***</sup><br>(1.27)     | 19.58 <sup>***</sup><br>(1.61) |
| FamInc (1000's)                  | -0.05 <sup>***</sup><br>(0.01)     | -0.06 <sup>***</sup><br>(0.01) |
| HHSize                           | 5.76 <sup>***</sup><br>(0.56)      | 6.25 <sup>***</sup><br>(0.68)  |
| HHNumKids                        | 2.32 <sup>**</sup><br>(0.70)       | 2.17 <sup>*</sup><br>(0.83)    |
| Log(Population)                  | -8.77<br>(18.17)                   | -7.21<br>(18.01)               |
| Log(FBCounts)                    | -11.11<br>(12.07)                  | 1.10<br>(15.35)                |
| Unemployment (%)                 | -0.35<br>(0.45)                    | -0.73<br>(0.59)                |
| UberEats                         | -1.28<br>(2.83)                    | -2.42<br>(3.56)                |
| Fixed Effects                    | County, Race, State*Year, EmpState |                                |
| Num. obs.                        | 31,259                             | 23,061                         |
| Num. of Counties                 | 181                                | 85                             |
| Adj. R <sup>2</sup> (full model) | 0.11                               | 0.12                           |
| Adj. R <sup>2</sup> (proj model) | 0.09                               | 0.10                           |

\*\*\*p < 0.001; \*\*p < 0.01; \*p < 0.05; +p < 0.1, County clustered SEs (in parentheses)

**Table A12. DiD2s 2<sup>nd</sup> Stage, Impact of Grubhub on Cooking Time**

| DV = CookingTime     | (1)<br>(2 <sup>nd</sup> Stage) OLS<br>Eventually Treated Counties                           |
|----------------------|---------------------------------------------------------------------------------------------|
| GrubhubAgg           | 0.12<br>(0.17)                                                                              |
| GrubhubDelivery      | -7.11 <sup>**</sup><br>(2.51)                                                               |
| N                    | 21,577                                                                                      |
| First Stage Controls | FamInc (1000's), Age, Female,<br>Race and Employment Status Dummies,<br>County and Year FEs |

Standard errors in parentheses \* p < 0.05, \*\* p < 0.01, \*\*\* p < 0.001

**Table A13. Impact of Grubhub on Cooking Times controlling for changes in grocery delivery**

| DV = CookingTimes (mins)         | BaseModel                | Whole Foods        | Instacart          | Online Grocery     |
|----------------------------------|--------------------------|--------------------|--------------------|--------------------|
| GrubhubAgg                       | 1.32<br>(2.08)           | 2.80<br>(2.71)     | 3.13<br>(2.56)     | 3.11<br>(2.60)     |
| GrubhubDel                       | -5.68**<br>(1.95)        | -6.41*<br>(2.61)   | -6.50*<br>(2.44)   | -6.98**<br>(2.55)  |
| Age (yrs)                        | 0.36***<br>(0.04)        | 0.34***<br>(0.05)  | 0.34***<br>(0.05)  | 0.34***<br>(0.05)  |
| Female                           | 19.59***<br>(1.62)       | 20.57***<br>(1.90) | 20.56***<br>(1.90) | 20.58***<br>(1.90) |
| FamInc (1000's)                  | -0.06***<br>(0.01)       | -0.06***<br>(0.01) | -0.06***<br>(0.01) | -0.06***<br>(0.01) |
| HHSize                           | 6.27***<br>(0.68)        | 6.36***<br>(0.82)  | 6.35***<br>(0.82)  | 6.37***<br>(0.82)  |
| HHNumkids                        | 2.16*<br>(0.84)          | 2.17*<br>(0.94)    | 2.19*<br>(0.93)    | 2.17*<br>(0.94)    |
| Not In Workforce                 | 16.31***<br>(1.24)       | 16.58***<br>(1.43) | 16.60***<br>(1.43) | 16.58***<br>(1.43) |
| Unemployed                       | 19.10***<br>(2.10)       | 20.53***<br>(2.43) | 20.55***<br>(2.44) | 20.52***<br>(2.44) |
| Log(Population)                  | -5.15<br>(18.85)         | -33.11<br>(29.07)  | -13.59<br>(28.13)  | -25.31<br>(32.16)  |
| Log(FBCounts)                    | 1.07<br>(15.04)          | -13.35<br>(15.59)  | -19.82<br>(16.83)  | -15.89<br>(15.55)  |
| Unemployment (%)                 | -0.71<br>(0.58)          | -0.91+<br>(0.49)   | -0.57<br>(0.53)    | -0.79<br>(0.49)    |
| Gtrends(' Whole Foods')          |                          | -0.29<br>(0.23)    |                    | -0.34<br>(0.21)    |
| Gtrends(Instacart)               |                          |                    | 0.32<br>(0.58)     | 0.56<br>(0.53)     |
| Fixed Effects                    | County, Race, State*Year |                    |                    |                    |
| Num. obs.                        | 23,061                   | 17,317             | 17,317             | 17,317             |
| Adj. R <sup>2</sup> (full model) | 0.12                     | 0.12               | 0.12               | 0.12               |
| Adj. R <sup>2</sup> (proj model) | 0.10                     | 0.10               | 0.10               | 0.10               |

\*\*\*p < 0.001; \*\*p < 0.01; \*p < 0.05; +p < 0.1, SEs clustered by County in parentheses

**Table A14. Summary statistics of BRFSS SMART Panel from 2005-19 for 73 MSAs.**

| Variable         | Mean      | Std. Dev. | Min  | Max   |
|------------------|-----------|-----------|------|-------|
| BMI              | 27.78     | 6.12      | 4.78 | 99.98 |
| Log(BMI)         | 3.3       | 0.2       | 1.56 | 4.6   |
| HHIncome(1000's) | 52.04     | 26.5      | 7.5  | 82    |
| Age (age group)  | 7.32      | 3.33      | 1    | 13    |
| GrubhubAgg       | 0.45      |           | 0    | 1     |
| GrubhubDel       | 0.2       |           | 0    | 1     |
| N                | 1,837,061 |           |      |       |

**Table A15. Grubhub entry dates  
by county**

| County FIPS | Grubhub Entry Year | Grubhub Delivery Entry |
|-------------|--------------------|------------------------|
| 17031       | 2004               | 2015                   |
| 55079       | 2004               | 2015                   |
| 06075       | 2006               | 2015                   |
| 36005       | 2006               |                        |
| 36047       | 2006               |                        |
| 36061       | 2006               | 2015                   |
| 36081       | 2006               |                        |
| 36085       | 2006               |                        |
| 25009       | 2008               | 2016                   |
| 25021       | 2008               |                        |
| 25025       | 2008               |                        |
| 06037       | 2009               | 2015                   |
| 11001       | 2009               | 2015                   |
| 42101       | 2009               | 2015                   |
| 06001       | 2010               | 2015                   |
| 06073       | 2010               | 2015                   |
| 08013       | 2010               | 2015                   |
| 08031       | 2010               | 2015                   |
| 41051       | 2010               | 2015                   |
| 53033       | 2010               | 2015                   |
| 04013       | 2011               | 2015                   |
| 06085       | 2011               | 2015                   |
| 09003       | 2011               | 2016                   |
| 09009       | 2011               |                        |
| 12086       | 2011               | 2015                   |
| 13089       | 2011               | 2015                   |
| 13121       | 2011               |                        |
| 24510       | 2011               | 2015                   |
| 26161       | 2011               | 2016                   |
| 42003       | 2011               | 2015                   |
| 48113       | 2011               | 2015                   |
| 48201       | 2011               | 2015                   |
| 48209       | 2011               | 2015                   |
| 48439       | 2011               |                        |
| 48453       | 2011               | 2015                   |
| 48491       | 2011               | 2015                   |
| 55025       | 2011               | 2016                   |
| 02135       | 2012               |                        |
| 04019       | 2012               | 2015                   |
| 06013       | 2012               |                        |
| 06059       | 2012               | 2015                   |
| 06067       | 2012               | 2015                   |
| 06071       | 2012               |                        |
| 06081       | 2012               |                        |
| 08001       | 2012               |                        |
| 08005       | 2012               |                        |
| 08035       | 2012               |                        |
| 08041       | 2012               | 2016                   |
| 08059       | 2012               |                        |
| 08069       | 2012               | 2018                   |
| 09001       | 2012               |                        |
| 09004       | 2012               | 2015                   |
| 09007       | 2012               |                        |
| 09013       | 2012               |                        |
| 10003       | 2012               |                        |
| 12001       | 2012               | 2015                   |
| 12011       | 2012               |                        |

|       |      |      |
|-------|------|------|
| 12031 | 2012 | 2015 |
| 12057 | 2012 | 2015 |
| 12073 | 2012 |      |
| 12095 | 2012 | 2015 |
| 12099 | 2012 |      |
| 13067 | 2012 |      |
| 13087 | 2012 |      |
| 16055 | 2012 |      |
| 17019 | 2012 | 2015 |
| 17043 | 2012 |      |
| 17089 | 2012 |      |
| 17097 | 2012 |      |
| 17113 | 2012 |      |
| 17197 | 2012 |      |
| 18035 | 2012 |      |
| 18097 | 2012 | 2015 |
| 18105 | 2012 | 2018 |
| 18157 | 2012 |      |
| 19103 | 2012 |      |
| 19169 | 2012 |      |
| 20091 | 2012 |      |
| 20161 | 2012 |      |
| 24005 | 2012 |      |
| 24021 | 2012 |      |
| 24031 | 2012 |      |
| 24033 | 2012 |      |
| 25013 | 2012 | 2018 |
| 25017 | 2012 |      |
| 26037 | 2012 | 2018 |
| 26045 | 2012 | 2018 |
| 26065 | 2012 | 2018 |
| 26073 | 2012 |      |
| 26077 | 2012 | 2018 |
| 26081 | 2012 | 2016 |
| 26163 | 2012 | 2015 |
| 27053 | 2012 | 2015 |
| 27123 | 2012 |      |
| 29019 | 2012 | 2018 |
| 29037 | 2012 |      |
| 29047 | 2012 | 2016 |
| 29095 | 2012 | 2016 |
| 29165 | 2012 |      |
| 29510 | 2012 | 2015 |
| 32003 | 2012 | 2015 |
| 34003 | 2012 |      |
| 34007 | 2012 |      |
| 34013 | 2012 |      |
| 34017 | 2012 | 2015 |
| 34021 | 2012 |      |
| 34023 | 2012 |      |
| 34025 | 2012 |      |
| 36001 | 2012 | 2015 |
| 36055 | 2012 | 2016 |
| 36059 | 2012 |      |
| 36067 | 2012 | 2016 |
| 36083 | 2012 |      |
| 36103 | 2012 |      |
| 36109 | 2012 |      |
| 36119 | 2012 |      |
| 37037 | 2012 |      |
| 37063 | 2012 | 2016 |
| 37081 | 2012 | 2018 |

|       |      |      |
|-------|------|------|
| 37097 | 2012 | 2015 |
| 37135 | 2012 |      |
| 37147 | 2012 |      |
| 37183 | 2012 |      |
| 39035 | 2012 | 2015 |
| 39041 | 2012 | 2015 |
| 39045 | 2012 |      |
| 39049 | 2012 |      |
| 39173 | 2012 |      |
| 40017 | 2012 | 2018 |
| 40027 | 2012 | 2018 |
| 40109 | 2012 | 2018 |
| 41039 | 2012 | 2016 |
| 41067 | 2012 |      |
| 42027 | 2012 |      |
| 42029 | 2012 |      |
| 42077 | 2012 |      |
| 42091 | 2012 |      |
| 42093 | 2012 |      |
| 42095 | 2012 |      |
| 44007 | 2012 | 2016 |
| 45051 | 2012 | 2018 |
| 45079 | 2012 | 2018 |
| 47037 | 2012 | 2015 |
| 47093 | 2012 | 2016 |
| 47149 | 2012 |      |
| 48029 | 2012 | 2015 |
| 48041 | 2012 |      |
| 48085 | 2012 |      |
| 48121 | 2012 |      |
| 48157 | 2012 |      |
| 48339 | 2012 |      |
| 48473 | 2012 |      |
| 51003 | 2012 |      |
| 51013 | 2012 | 2015 |
| 51059 | 2012 |      |
| 51121 | 2012 |      |
| 51510 | 2012 |      |
| 51540 | 2012 |      |
| 51600 | 2012 |      |
| 51610 | 2012 |      |
| 51760 | 2012 | 2016 |
| 51810 | 2012 | 2015 |
| 51830 | 2012 |      |
| 53011 | 2012 |      |
| 54061 | 2012 |      |
| 91303 | 2012 |      |
| 91311 | 2012 |      |
| 06041 | 2013 |      |
| 22033 | 2013 | 2018 |
| 30031 | 2013 |      |
| 32031 | 2013 | 2018 |
| 35001 | 2013 | 2016 |
| 35043 | 2013 | 2016 |
| 36027 | 2013 |      |
| 46099 | 2013 |      |
| 48215 | 2013 | 2018 |
| 49035 | 2013 | 2016 |
| 12103 | 2014 |      |
| 12115 | 2014 | 2018 |
| 13185 | 2014 |      |
| 18141 | 2014 | 2018 |

## 2 APPENDIX B: SURVEY DESIGN

**Table B1. Survey Questions**

| QNo. | Question                                                                                                                                                                                                                                                                                                                                                                                                                                                                                     | Question-Type   |
|------|----------------------------------------------------------------------------------------------------------------------------------------------------------------------------------------------------------------------------------------------------------------------------------------------------------------------------------------------------------------------------------------------------------------------------------------------------------------------------------------------|-----------------|
| 1    | How old are you? - Under 18 (1) , 18-24 years old (2) , 25-34 years old (3) , 35-44 years old (4) , 45-54 years old (5) , 55-64 years old (6) , 65+ years old (7)                                                                                                                                                                                                                                                                                                                            | Multiple Choice |
| 2    | How do you describe yourself? - Male (1) , Female (2) , Non-binary / third gender (3) , Prefer to self-describe (4) [Text], Prefer not to say (5)                                                                                                                                                                                                                                                                                                                                            | Multiple Choice |
| 3    | What best describes your employment status over the last three months? - Working full-time (1) , Working part-time (2) , Unemployed and looking for work (3) , A homemaker or stay-at-home parent (4) , Student (5) , Retired (6) , Other (7)                                                                                                                                                                                                                                                | Multiple Choice |
| 4    | What is your current marital status? - Married (1) , Living with a partner (2) , Widowed (3) , Divorced/Separated (4) , Never been married (5)                                                                                                                                                                                                                                                                                                                                               | Multiple Choice |
| 5    | How many people live or stay in this household at least half the time?                                                                                                                                                                                                                                                                                                                                                                                                                       | Text            |
| 6    | How many children under 18 live with you?                                                                                                                                                                                                                                                                                                                                                                                                                                                    | Text            |
| 7    | In which state do you currently reside?                                                                                                                                                                                                                                                                                                                                                                                                                                                      | Dropdown        |
| 8    | Choose one or more races that you consider yourself to be: - White or Caucasian (1) , Black or African American (2) , American Indian/Native American or Alaska Native (3) , Asian (4) , Native Hawaiian or Other Pacific Islander (5) , Other (6) , Prefer not to say (7)                                                                                                                                                                                                                   | Multiple Choice |
| 9    | What is the highest level of education you have completed? - Some high school or less (1) , High school diploma or GED (2) , Some college, but no degree (3) , Associates or technical degree (4) , Bachelor's degree (5) , Graduate or professional degree (MA, MS, MBA, PhD, JD, MD, DDS etc.) (6) , Prefer not to say (7)                                                                                                                                                                 | Multiple Choice |
| 10   | What was your total household income before taxes during the past 12 months? - Less than \$25,000 (1) , \$25,000-\$49,999 (2) , \$50,000-\$74,999 (3) , \$75,000-\$99,999 (4) , \$100,000-\$149,999 (5) , \$150,000 or more (6) , Prefer not to say (7)                                                                                                                                                                                                                                      | Multiple Choice |
| 11   | What is your height?                                                                                                                                                                                                                                                                                                                                                                                                                                                                         | Text            |
| 12   | What is your weight in pounds (lbs)?                                                                                                                                                                                                                                                                                                                                                                                                                                                         | Text            |
| 13   | Would you say that in general your health is ____ - Excellent (1) , Good (2) , Average (3) , Poor (4) , Terrible (5)                                                                                                                                                                                                                                                                                                                                                                         | Multiple Choice |
| 14   | Now thinking about your physical health, which includes physical illness and injury, for how many days during the past 30 days was your physical health not good?                                                                                                                                                                                                                                                                                                                            | Text            |
| 15   | Now thinking about your mental health, which includes stress, depression, and problems with emotions, for how many days during the past 30 days was your mental health not good?                                                                                                                                                                                                                                                                                                             | Text            |
| 16   | During the past 30 days, for about how many days did poor physical or mental health keep you from doing your usual activities, such as self-care, work, or recreation?                                                                                                                                                                                                                                                                                                                       | Text            |
| 17   | Do you have any kind of health care coverage, including health insurance, prepaid plans such as HMOs, or government plans such as Medicare, or Indian Health Service?                                                                                                                                                                                                                                                                                                                        | Text            |
| 18   | On average, how many hours of sleep do you get in a 24-hour period?                                                                                                                                                                                                                                                                                                                                                                                                                          | Slider          |
| 19   | In a week on average how often do you perform rigorous exercise/physical activity (with at least 10 minutes of sweating or elevated heart rate)?                                                                                                                                                                                                                                                                                                                                             | Slider          |
| 20   | In a typical week, how often do you eat each of the following meals? Breakfast, Lunch, Dinner, Snacks – 0 to 7                                                                                                                                                                                                                                                                                                                                                                               | Matrix          |
| 21   | How often in a week do you eat the following? <ul style="list-style-type: none"> <li>• Rows - Home-cooked Meals (1), Takeaway Meals (2), In-restaurant Meals (3), Cafeteria Meals (4), Grocery/Deli bought Meals (5), Frozen Meals (6), Fresh Fruits (not juice) (7), 100% Fruit Juice (8), Vegetables, Leafy greens, or Salads (9)</li> <li>• Columns - Never (0%) (1), Sometimes (25% or less) (2), About half the time (25-50%) (3), Most of the time (50-75%) (4), Always (5)</li> </ul> | Matrix          |

|    |                                                                                                                                                                                                                                                                                                                                                                                                                                                                                                                                                                                                            |                 |
|----|------------------------------------------------------------------------------------------------------------------------------------------------------------------------------------------------------------------------------------------------------------------------------------------------------------------------------------------------------------------------------------------------------------------------------------------------------------------------------------------------------------------------------------------------------------------------------------------------------------|-----------------|
| 22 | How much (in dollars) do you approximately spend (per person) on the following per month?<br>Groceries & Eating Out – 0 to 1000\$                                                                                                                                                                                                                                                                                                                                                                                                                                                                          | Slider          |
| 23 | Are you the primary meal preparer in your household? - No (1) , Yes (2)                                                                                                                                                                                                                                                                                                                                                                                                                                                                                                                                    |                 |
| 24 | In a week how often do you/someone in your household cooks the following meals? Breakfast, Lunch, Dinner, Snacks – 0 to 7                                                                                                                                                                                                                                                                                                                                                                                                                                                                                  | Matrix          |
| 25 | In the last 24 hours how many times did you prepare a meal? - 0 (1) , 1 (2) , 2 (3) , 3 (4) , More than 3 (5)                                                                                                                                                                                                                                                                                                                                                                                                                                                                                              | Multiple Choice |
| 26 | How many minutes (on average) do you/your primary meal preparer spend cooking a single meal on average – 0 to 180 [On a weekday, On a weekend]                                                                                                                                                                                                                                                                                                                                                                                                                                                             | Slider          |
| 27 | Indicate on a scale of 1-5, while cooking, how much your household relies on each of the following. <ul style="list-style-type: none"> <li>• Rows – Fresh ingredients/ cooking from scratch - like fresh vegetables, meats, dairy and poultry (1) , Packaged/boxed/canned ingredients - like premixes, seasoning packets, portioned meal kits (2) , Frozen products - like frozen vegetables, meats, pre-made meal components (3) , Recipes from a book, online sources, apps etc. (4)</li> <li>• Columns - Never (1), Sometimes (2), About half the time (3), Most of the time (4), Always (5)</li> </ul> | Matrix          |
| 28 | Have you ever used any online food delivery services (like Grubhub or UberEats)? - No (1) , Yes (2)                                                                                                                                                                                                                                                                                                                                                                                                                                                                                                        | Multiple Choice |
| 29 | When did you first order food online ever? - More than 5 years ago (1) , More than 2 years ago (2) , Last year (3) , This year (4)                                                                                                                                                                                                                                                                                                                                                                                                                                                                         | Multiple Choice |
| 30 | Choose which of the following is true for the <b>majority</b> of your online food delivery orders. - I mostly order for myself/others (1) , Someone else mostly orders for me (2)                                                                                                                                                                                                                                                                                                                                                                                                                          | Multiple Choice |
| 31 | Select all the online prepared food delivery services that you have ever used. - Grubhub (1) , Postmates (2) , DoorDash (3) , UberEats (4) , Eatstreet (5) , Seamless (6) , ChowNow (7) , Others, please specify (8)                                                                                                                                                                                                                                                                                                                                                                                       | Multiple Choice |
| 32 | How often do you order food online? - At least once every 3 days (1) , At least once a week (2) , At least once every two weeks (3) , At least once a month (4) , Less than once a month (5)                                                                                                                                                                                                                                                                                                                                                                                                               | Multiple Choice |
| 33 | How much do you generally spend per delivery order? - Less than 15\$ (1) , Between 15-30\$ (2) , Between 30-50\$ (3) , More than 50\$ (4)                                                                                                                                                                                                                                                                                                                                                                                                                                                                  | Multiple Choice |
| 34 | Which of the following do you use online food delivery apps for (you can choose more than one)? - Ordering Delivery (1) , Ordering Pickup (2)                                                                                                                                                                                                                                                                                                                                                                                                                                                              | Multiple Choice |
| 35 | Which meals do you generally order using online food delivery (you can choose more than one)? - Breakfast (1) , Lunch (2) , Dinner (3) , Snacks (4) , Beverages (5)                                                                                                                                                                                                                                                                                                                                                                                                                                        | Multiple Choice |
| 36 | On a scale of 1-5, how often do you order from the following type of restaurants using online delivery? <ul style="list-style-type: none"> <li>• Rows - Fast-food restaurants (McDonalds, Taco Bell etc.) (1), Casual sit-down restaurants (2), Fine dining restaurants (3), Coffeeshops &amp; Bakeries (4)</li> <li>• Columns - Never (1), Sometimes (2), About half the time (3), Most of the time (4), Always (5)</li> </ul>                                                                                                                                                                            | Matrix          |
| 37 | For each of these please indicate on a scale of 1-5, how they influence your decision to order food online. <ul style="list-style-type: none"> <li>• Rows – Delivery Time (1), Delivery and service fees (2), Variety in restaurant options (3), Convenience (4), How much time I have (5), How healthy the food is (6)</li> <li>• Columns - Never (1), Sometimes (2), About half the time (3), Most of the time (4), Always (5)</li> </ul>                                                                                                                                                                | Matrix          |
| 38 | Recall your behavior before you had tried online prepared food delivery services and indicate on a scale of 1-5 your agreement with the following statements. <ul style="list-style-type: none"> <li>• Rows - I eat out more often because of online food delivery options. (1), Per order, I order</li> </ul>                                                                                                                                                                                                                                                                                             | Matrix          |

|  |                                                                                                                                                                                                                                                                                                                                                                                                                                                                                                                                                                                                                         |  |
|--|-------------------------------------------------------------------------------------------------------------------------------------------------------------------------------------------------------------------------------------------------------------------------------------------------------------------------------------------------------------------------------------------------------------------------------------------------------------------------------------------------------------------------------------------------------------------------------------------------------------------------|--|
|  | <p>greater quantities online than I would in person at a restaurant. (2), I order healthier foods online than I would in person at a restaurant. (3), I often have leftovers from my online delivery orders. (4), I am more comfortable trying different restaurants online than I am in person. (5), I cook less often than before because I order food online (6), I dine-in at restaurants less because I order food online (7)</p> <ul style="list-style-type: none"> <li>Columns - Strongly disagree (1), Somewhat disagree (2), Neither agree nor disagree (3), Somewhat agree (4), Strongly agree (5)</li> </ul> |  |
|--|-------------------------------------------------------------------------------------------------------------------------------------------------------------------------------------------------------------------------------------------------------------------------------------------------------------------------------------------------------------------------------------------------------------------------------------------------------------------------------------------------------------------------------------------------------------------------------------------------------------------------|--|

**Table B2. Descriptive Statistics of Key Variables from Survey**

| Food & Eating Descriptives                   |                                                                                           |     |        |          |     |       |
|----------------------------------------------|-------------------------------------------------------------------------------------------|-----|--------|----------|-----|-------|
|                                              | Statistic                                                                                 | N   | Mean   | St. Dev. | Min | Max   |
| Meal eating frequency per week               | Breakfast                                                                                 | 596 | 4.10   | 2.67     | 0   | 7     |
|                                              | Lunch                                                                                     | 596 | 5.40   | 2.12     | 0   | 7     |
|                                              | Dinner                                                                                    | 596 | 6.56   | 1.19     | 0   | 7     |
|                                              | Snacks                                                                                    | 596 | 4.95   | 2.08     | 0   | 7     |
| How often do you eat the following in a week | Home-cooked Meals                                                                         | 596 | 3.73   | 0.87     | 1   | 5     |
|                                              | Takeaway Meals                                                                            | 596 | 2.05   | 0.68     | 1   | 5     |
|                                              | In-restaurant Meals                                                                       | 596 | 1.67   | 0.59     | 1   | 4     |
|                                              | Cafeteria Meals                                                                           | 596 | 1.12   | 0.42     | 1   | 5     |
|                                              | Grocery/Deli bought Meals                                                                 | 596 | 1.77   | 0.78     | 1   | 5     |
|                                              | Frozen Meals                                                                              | 596 | 1.92   | 0.80     | 1   | 5     |
|                                              | Fresh Fruits (not juice)                                                                  | 596 | 2.73   | 1.21     | 1   | 5     |
|                                              | 100% Fruit Juice                                                                          | 596 | 1.85   | 1.00     | 1   | 5     |
| Monthly spending per person                  | Groceries                                                                                 | 583 | 291.08 | 173.57   | 0   | 1,000 |
|                                              | Eating Out                                                                                | 540 | 136.11 | 113.36   | 0   | 700   |
|                                              | PrimaryCook [0/1]                                                                         | 596 | 0.72   | 0.45     | 0   | 1     |
|                                              | HoursSpentCooking (out of last 24)                                                        | 595 | 1.86   | 1.07     | 0   | 4     |
| Weekly cooking frequency                     | Breakfast                                                                                 | 595 | 3.37   | 2.63     | 0   | 7     |
|                                              | Lunch                                                                                     | 595 | 3.99   | 2.36     | 0   | 7     |
|                                              | Dinner                                                                                    | 595 | 5.53   | 1.62     | 0   | 7     |
|                                              | Snacks                                                                                    | 595 | 3.03   | 2.59     | 0   | 7     |
|                                              | MinutesSpentCooking (Weekday)                                                             | 596 | 36.30  | 21.61    | 0   | 180   |
|                                              | MinutesSpentCooking (Weekend)                                                             | 596 | 42.70  | 27.83    | 0   | 180   |
| How often do you use the following (1-5)     | Fresh ingredients/ cooking from scratch - like fresh vegetables, meats, dairy and poultry | 596 | 3.50   | 1.01     | 1   | 5     |
|                                              | Packaged/boxed/canned ingredients - like premixes, seasoning packets, portioned meal kits | 596 | 2.60   | 0.94     | 1   | 5     |
|                                              | Frozen products - like frozen vegetables, meats, pre-made meal components                 | 596 | 2.66   | 0.94     | 1   | 5     |
|                                              | Recipes from a book, online sources, apps etc.                                            | 596 | 2.44   | 0.99     | 1   | 5     |

**Table B3. Correlation between Daily Cooking Time and Use of Online Food Delivery**

| <b>DV = Avg. Daily Cooking Duration (mins)</b> | <b>Model 1</b>                         | <b>Model 2</b>    |
|------------------------------------------------|----------------------------------------|-------------------|
| Female                                         | 1.43<br>(2.51)                         | 1.19<br>(2.55)    |
| Age (years)                                    | 0.16<br>(0.18)                         | -0.07<br>(0.20)   |
| Married                                        | 4.25**<br>(0.77)                       | 4.93***<br>(0.74) |
| HouseholdSize                                  | 5.03***<br>(0.75)                      | 4.58**<br>(1.07)  |
| Children                                       | -1.62<br>(1.12)                        | -1.46<br>(0.96)   |
| IncomeLvl                                      | -0.71<br>(0.94)                        | -0.59<br>(0.95)   |
| IsPrimaryCook                                  | 2.11<br>(1.47)                         | 2.91<br>(1.60)    |
| EverOrderedOnline                              | 1.42<br>(1.13)                         |                   |
| FoodDelivery (This Yr)                         |                                        | 14.14*<br>(4.16)  |
| FoodDelivery (Last Yr)                         |                                        | 7.71+<br>(3.78)   |
| FoodDelivery (More than 2yrs ago)              |                                        | -0.99<br>(2.56)   |
| FoodDelivery (More than 5yrs ago)              |                                        | -1.48*<br>(0.46)  |
| Fixed Effects                                  | Race, Education Lvl, Employment Status |                   |
| Num. obs.                                      | 594                                    | 594               |
| Adj. R <sup>2</sup> (full model)               | 0.09                                   | 0.12              |
| Adj. R <sup>2</sup> (proj model)               | 0.08                                   | 0.11              |

\*\*\* p < 0.001; \*\* p < 0.01; \* p < 0.05; +p < 0.1, SEs in parentheses.

### 3 APPENDIX C: GOOGLE TRENDS DATA

The complexity of collecting Google Trends data (specifically region and time specific data on Grubhub and DoorDash) bears some discussion as well, despite the prevalence of such data in prior information systems and economics scholarship (Choi and Varian 2012, Hall et al. 2018, Park and Kim 2018). The challenge is that Google Trends only offers a bounded metric (1-100) of the relative intensity of search when those Trends are retrieved. This raises the question of how to compare across such searches of Trends (i.e. to compare across time and geography). To do so, we follow the approach described by Hall et al. (2018). Under this approach, we gather data for the search terms mentioned in the manuscript: e.g. “Grubhub” or “DoorDash” etc. by searching for them by metro area (See [Trends help](#) for how metro areas are defined). As Google Trends only allows for relative comparisons of trends between time and geographies and does not offer an absolute count of search results, each search contains both a control keyword (“food delivery”) and control geography (San Francisco-Oakland, CA). These data therefore reflect the relative monthly levels of interest in the focal word (e.g. Grubhub) and the focal geography relative to the interest in “food delivery” in the San Francisco area over time. To estimate the average interest in a keyword per geography each year we average the monthly levels by that geography and year.
